# Supplementary material for: Impact of the Extremities Positioning on the Set-Up Reproducibility for the Total Marrow Irradiation Treatment
Source: MDPI journal article supplement (doi:10.3390/curroncol30040309), 2023-04-06
Supplement: s1 [file s1]

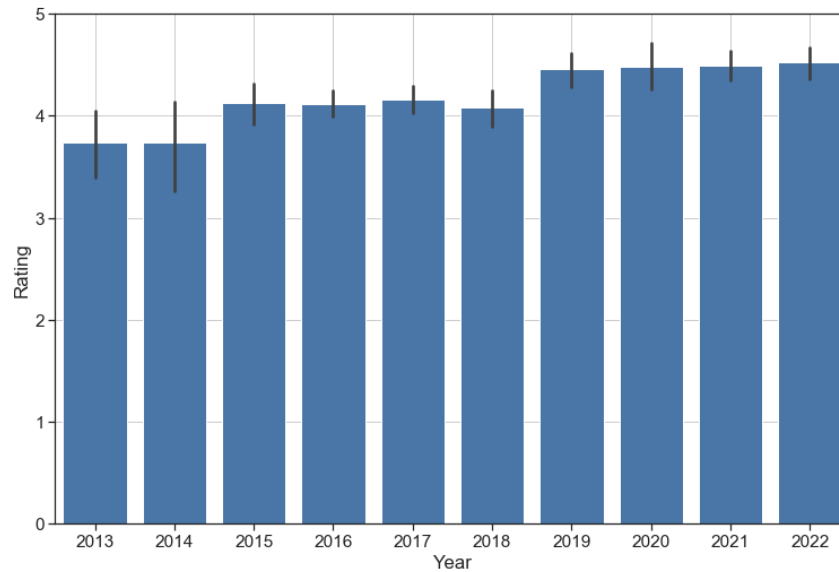

**Figure S1.** Mean qualitative rating over the years. Bars indicate the standard deviation.

**Table S1.** CC, AP, LR isocenters online shifts. Median values of the online shift between CBCT-CT in CC, AP, and LR direction for each isocenter position. IQR values are reported in parentheses.

|                     | CC online shift<br>[mm] | AP online shift<br>[mm] | LR online shift<br>[mm] |
|---------------------|-------------------------|-------------------------|-------------------------|
| <b>Head</b>         | -0.2<br>(-2.2, 1.2)     | -0.6<br>(-1.9, 1.2)     | -0.3<br>(-1.9, 1.1)     |
| <b>Shoulders</b>    | 0<br>(0, 0.1)           | -0.3<br>(-2.0, 0.7)     | 0<br>(-1.1, 1.4)        |
| <b>Abdomen/Arms</b> | 0<br>(0, 1.0)           | -1.1<br>(-3.0, 0)       | 1.1<br>(-2.0, 4.2)      |
| <b>Hip</b>          | 0<br>(-0.1, 0.7)        | -1.5<br>(-3.7, 0.1)     | 0<br>(-2.1, 1.6)        |
| <b>Legs</b>         | 0<br>(-0.1, 0.2)        | 0.1<br>(-1.3, 1.8)      | 0<br>(-2.3, 2.1)        |
| <b>Feet</b>         | 0<br>(0, 1.8)           | 1.5<br>(0, 2.8)         | -0.4<br>(-2.1, 1.1)     |
| <b>Total</b>        | 0<br>(-0.1, 0.7)        | 0<br>(-2.1, 1.5)        | 0<br>(-2.1, 2.2)        |

**Table S2.** CC, AP, LR immobilization methods online shifts. Median values of the online shift between CBCT-CT in CC, AP, and LR direction, grouped by immobilization method. IQR values are reported in parentheses.

| Extremities<br>immobilization<br>method | CC online shift<br>[mm] | AP online shift<br>[mm] | LR online shift<br>[mm] |
|-----------------------------------------|-------------------------|-------------------------|-------------------------|
| <b>Arms leaning on the<br/>frame</b>    | 0<br>(0, 1.3)           | -0.9<br>(-2.6, 0)       | 0<br>(-2.8, 3.2)        |
| <b>Arms above the body</b>              | 0<br>(0, 0.6)           | -1.1<br>(-2.8, 0)       | 1.6<br>(-0.6, 4.3)      |
| <b>With feet cushions</b>               | 0.1<br>(-0.6, 1.8)      | 1.5<br>(0.2, 2.6)       | -0.4<br>(-2.0, 2.5)     |
| <b>Without feet cushions</b>            | 0<br>(0, 1.7)           | 1.5<br>(0, 2.9)         | -0.5<br>(-2.0, 0.8)     |
